# Supplementary material
Source: PubMed Central journal article supplement (PMC3191189)
Supplement: NIHMS327011-supplement-data_file_1.pdf [file NIHMS327011-supplement-data_file_1.pdf]

**Supplementary Table 1. Gene Transcripts Analyzed by RT-PCR.** List of the mRNAs examined and information on the Applied Biosystems primer/probe products utilized.

| Gene                                                | Abbr.           | NCBI Reference Sequence Number | Assay Number  | NCBI Location Chromosome        | Amplicon Length (bp) | Assay Location | Exon Boundary |
|-----------------------------------------------------|-----------------|--------------------------------|---------------|---------------------------------|----------------------|----------------|---------------|
| <b>IL-1 Family</b>                                  |                 |                                |               |                                 |                      |                |               |
| Interleukin 1 $\beta$                               | IL-1B           | NM_008361.3                    | Mm00434228_m1 | Chr. 2 - 129190315 - 129196856  | 90                   | 163            | 3,4           |
| Interleukin 1 $\alpha$                              | IL-1A           | NM_010554.4                    | Mm00439620_m1 | Chr. 2 - 129125346 - 129135708  | 68                   | 559            | 5,6           |
| Interleukin 1 Receptor Type 1                       | IL-1R1          | NM_01123382.1,<br>NM_008362.2  | Mm00434237_m1 | Chr. 1 - 40281925 - 40373022    | 63                   | 1020, 951      | 6,7           |
| Interleukin 1 Receptor Type 2                       | IL-1R2          | NM_010555.4                    | Mm00439622_m1 | Chr. 1 - 40141613 - 40182070    | 78                   | 48             | 1,2           |
| Caspase-1                                           | Caspase-1       | NM_009807.2                    | Mm00438023_m1 | Chr. 9 - 5298517 - 5307281      | 99                   | 533            | 3,4           |
| <b>Other Cytokines</b>                              |                 |                                |               |                                 |                      |                |               |
| Interleukin 6                                       | IL-6            | NM_031168.1                    | Mm00446190_m1 | Chr. 5 - 30339701 - 30346508    | 78                   | 237            | 2,3           |
| Tumor Necrosis Factor $\alpha$                      | TNFA            | NM_013693.2                    | Mm00443258_m1 | Chr. 17 - 35336335 - 35338941   | 81                   | 339            | 1,2           |
| Transforming Growth Factor $\beta$ 1                | TGFB1           | NM_011577.1                    | Mm00441724_m1 | Chr. 7 - 26472021 - 26490015    | 99                   | 1218           | 1,2           |
| <b>Chemokines</b>                                   |                 |                                |               |                                 |                      |                |               |
| CC Chemokine Ligand 2                               | CCL2            | NM_011333.2                    | Mm00441242_m1 | Chr. 11 - 81849079 - 81850954   | 74                   | 163            | 1,2           |
| CC Chemokine Receptor 2                             | CCR2            | NM_009915.1                    | Mm99999051_gH | Chr. 9 - 124016922 - 124023289  | 60                   | 443            | 3,3           |
| <b>Cell Activation Markers</b>                      |                 |                                |               |                                 |                      |                |               |
| Intercellular Adhesion Molecule 1                   | ICAM-1          | NM_010493.2                    | Mm00516023_m1 | Chr. 9 - 20820404 - 20833241    | 58                   | 402            | 2,3           |
| Glial Fibrillary Acidic Protein                     | GFAP            | NM_010277.2                    | Mm00546086_m1 | Chr. 11 - 102749991 - 102758445 | 70                   | 1244           | 7,8           |
| Cluster of Differentiation 11b/<br>Integrin Alpha M | CD11b/<br>ITGAM | NM_001082960.1,<br>NM_008401.2 | Mm00434455_m1 | Chr. 7 - 135206154 - 135262005  | 69                   | 337            | 3,4           |
| Major Histocompatibility Complex II AA              | MHC II AA       | NM_010378.2                    | Mm00439211_m1 | Chr. 17 - 34419696 - 34424716   | 119                  | 93             | 1,2           |
| <b>Prostaglandin Synthesis</b>                      |                 |                                |               |                                 |                      |                |               |
| Cyclooxygenase 1                                    | COX-1           | NM_008969.2                    | Mm00477214_m1 | Chr. 2 - 36085946 - 36107789    | 66                   | 244            | 2,3           |
| Cyclooxygenase 2                                    | COX-2           | NM_011198.3                    | Mm00478374_m1 | Chr. 1 - 151947254 - 151955147  | 80                   | 739            | 5,6           |
| Prostaglandin E Synthase                            | Ptges           | NM_022415.2                    | Mm00452105_m1 | Chr. 2 - 30744991 - 30758817    | 87                   | 290            | 2,3           |
| Prostaglandin E Synthase 2                          | Ptges2          | NM_133783.1                    | Mm00460181_m1 | Chr. 2 - 32251778 - 32258259    | 73                   | 486            | 2,3           |
| Prostaglandin E Synthase 3                          | Ptges3          | NM_019766.2                    | Mm00727367_s1 | Chr. 10 - 127496038 - 127514310 | 70                   | 1849           | 8,8           |
| <b>Oxidative Stress</b>                             |                 |                                |               |                                 |                      |                |               |
| Heme Oxygenase 1                                    | HO-1            | NM_010442.1                    | Mm00516004_m1 | Chr. 8 - 77617521 - 77624484    | 72                   | 155            | 1,2           |
| Glutathione S-Transferase Pi                        | GSTP            | NM_013541.1                    | Mm00496606_m1 | Chr. 19 - 4035411 - 4037912     | 68                   | 48             | 1,2           |
| Superoxide Dismutase 2                              | SOD2            | NM_013671.3                    | Mm00449726_m1 | Chr. 17 - 13200705 - 13210985   | 67                   | 428            | 2,3           |
| <b>Housekeeping</b>                                 |                 |                                |               |                                 |                      |                |               |
| Ribosomal 18s                                       | 18S             | X03205.1                       | Hs99999901_s1 |                                 | 187                  |                |               |

**Supplementary Table 2. Statistical Results from the RT-PCR Analysis. Kruskal-Wallis tests (non-parametric one way ANOVAs) were run at each time point for each gene, followed by Dunn's multiple comparison tests comparing each dose to its respective control. For each gene and at all time points, the relative fold changes for dose compared to control animals are displayed. Changes deemed significant by post-test are indicated by shaded boxes. Within those boxes, italicized values represent a statistical significance of less than 0.05, emboldened values represent a statistical significance of less than 0.01, while emboldened and italicized values represent a statistical significance of less than 0.001.**

| Gene      | 4 Hours |         |               |                       |                       |                       | 1 Day   |         |               |               |                      |                      |
|-----------|---------|---------|---------------|-----------------------|-----------------------|-----------------------|---------|---------|---------------|---------------|----------------------|----------------------|
|           | p-value | KW Stat | 5 Gy          | 15 Gy                 | 25 Gy                 | 35 Gy                 | p-value | KW Stat | 5 Gy          | 15 Gy         | 25 Gy                | 35 Gy                |
| Caspase-1 | 0.0411  | 9.961   | 1.023 ± 0.105 | <i>1.426 ± 0.119</i>  | 1.031 ± 0.094         | 1.214 ± 0.124         | 0.2362  | 5.54    | 1.633 ± 0.309 | 1.761 ± 0.239 | 1.929 ± 0.610        | 1.688 ± 0.373        |
| CCL2      | 0.0005  | 19.84   | 1.878 ± 0.093 | <i>5.152 ± 1.174</i>  | <b>8.060 ± 1.430</b>  | <b>8.840 ± 1.670</b>  | 0.057   | 9.169   | 1.383 ± 0.284 | 1.214 ± 0.209 | 1.612 ± 0.360        | 2.315 ± 0.361        |
| CCR2      | 0.0714  | 8.617   | 0.898 ± 0.059 | 0.943 ± 0.081         | 0.647 ± 0.047         | 0.742 ± 0.068         | 0.7885  | 1.712   | 1.060 ± 0.430 | 1.111 ± 0.161 | 1.787 ± 0.830        | 0.888 ± 0.168        |
| CD11b     | 0.4771  | 3.505   | 0.905 ± 0.055 | 0.976 ± 0.205         | 0.818 ± 0.085         | 0.813 ± 0.092         | 0.844   | 8.204   | 1.170 ± 0.063 | 0.872 ± 0.081 | 0.918 ± 0.146        | 0.789 ± 0.052        |
| COX-1     | 0.3847  | 4.161   | 0.757 ± 0.053 | 0.878 ± 0.162         | 0.684 ± 0.072         | 0.738 ± 0.094         | 0.2139  | 5.809   | 1.144 ± 0.049 | 1.036 ± 0.072 | 0.938 ± 0.183        | 0.895 ± 0.067        |
| COX-2     | 0.3909  | 4.113   | 0.755 ± 0.036 | 0.939 ± 0.127         | 0.798 ± 0.077         | 0.740 ± 0.106         | 0.7444  | 1.953   | 0.952 ± 0.115 | 0.873 ± 0.066 | 1.006 ± 0.174        | 1.037 ± 0.103        |
| GFAP      | 0.9384  | 0.8     | 0.988 ± 0.031 | 1.160 ± 0.187         | 0.980 ± 0.122         | 1.054 ± 0.053         | 0.0088  | 13.57   | 1.670 ± 0.398 | 1.750 ± 0.135 | <i>2.479 ± 0.400</i> | <b>2.949 ± 0.474</b> |
| GSTP-1    | 0.1741  | 6.356   | 0.827 ± 0.033 | 1.118 ± 0.077         | 0.906 ± 0.105         | 0.987 ± 0.090         | 0.5457  | 3.073   | 1.479 ± 0.346 | 1.335 ± 0.085 | 1.633 ± 0.482        | 1.624 ± 0.243        |
| HO-1      | 0.1722  | 6.385   | 0.879 ± 0.021 | 1.074 ± 0.192         | 1.057 ± 0.156         | 1.087 ± 0.111         | 0.0054  | 14.7    | 1.454 ± 0.101 | 1.358 ± 0.051 | 1.451 ± 0.247        | <b>1.905 ± 0.132</b> |
| ICAM-1    | 0.0009  | 18.59   | 2.381 ± 0.246 | <i>5.155 ± 0.839</i>  | <b>6.666 ± 1.148</b>  | <b>6.668 ± 0.734</b>  | 0.0733  | 8.553   | 0.508 ± 0.071 | 0.590 ± 0.056 | 0.791 ± 0.133        | 1.291 ± 0.160        |
| IL-1α     | 0.0326  | 10.51   | 2.458 ± 0.949 | <i>2.892 ± 0.244</i>  | <i>2.903 ± 0.575</i>  | 2.028 ± 0.518         | 0.0404  | 10      | 1.445 ± 0.261 | 1.643 ± 0.098 | <i>2.104 ± 0.392</i> | 1.807 ± 0.223        |
| IL-1β     | 0.0655  | 8.829   | 1.414 ± 0.410 | 2.895 ± 0.967         | 0.782 ± 0.069         | 1.057 ± 0.213         | 0.7295  | 2.034   | 0.973 ± 0.421 | 0.782 ± 0.151 | 0.925 ± 0.303        | 1.124 ± 0.172        |
| IL-1R1    | 0.482   | 3.473   | 0.825 ± 0.069 | 1.098 ± 0.126         | 1.158 ± 0.206         | 1.144 ± 0.127         | 0.844   | 1.401   | 1.102 ± 0.122 | 1.107 ± 0.079 | 1.055 ± 0.106        | 1.101 ± 0.024        |
| IL-1R2    | 0.1423  | 6.881   | 1.127 ± 0.184 | 0.931 ± 0.100         | 0.626 ± 0.087         | 0.788 ± 0.062         | 0.3387  | 4.533   | 2.677 ± 1.060 | 1.530 ± 0.206 | 2.073 ± 0.631        | 1.379 ± 0.322        |
| IL-6      | 0.1756  | 6.333   | 0.568 ± 0.109 | 0.660 ± 0.085         | 0.654 ± 0.0094        | 0.803 ± 0.069         | 0.3526  | 4.417   | 1.707 ± 0.131 | 1.502 ± 0.270 | 1.228 ± 0.317        | 1.320 ± 0.326        |
| MHC II AA | 0.6168  | 2.657   | 0.999 ± 0.053 | 1.018 ± 0.091         | 0.815 ± 0.118         | 0.931 ± 0.056         | 0.737   | 1.993   | 1.212 ± 0.331 | 0.754 ± 0.172 | 1.263 ± 0.483        | 0.779 ± 0.160        |
| Ptges     | 0.3867  | 4.145   | 0.868 ± 0.067 | 1.301 ± 0.311         | 1.280 ± 0.173         | 1.300 ± 0.203         | 0.2216  | 5.713   | 1.261 ± 0.156 | 1.125 ± 0.088 | 1.396 ± 0.197        | 1.634 ± 0.179        |
| Ptges2    | 0.6029  | 2.736   | 0.790 ± 0.038 | 1.137 ± 0.268         | 0.873 ± 0.145         | 0.860 ± 0.089         | 0.4302  | 3.825   | 1.399 ± 0.311 | 1.175 ± 0.066 | 1.662 ± 0.486        | 1.606 ± 0.282        |
| Ptges3    | 0.3669  | 4.3     | 1.181 ± 0.069 | 1.544 ± 0.213         | 1.462 ± 0.251         | 1.547 ± 0.320         | 0.2597  | 5.281   | 1.443 ± 0.070 | 1.255 ± 0.056 | 1.176 ± 0.356        | 1.173 ± 0.115        |
| SOD2      | 0.1173  | 7.376   | 0.912 ± 0.014 | 1.167 ± 0.104         | 0.927 ± 0.081         | 1.021 ± 0.072         | 0.4639  | 3.593   | 1.354 ± 0.195 | 1.358 ± 0.038 | 1.523 ± 0.326        | 1.518 ± 0.189        |
| TGF-β1    | 0.0213  | 11.52   | 1.176 ± 0.036 | <i>1.565 ± 0.123</i>  | 1.424 ± 0.106         | <i>1.544 ± 0.166</i>  | 0.837   | 1.441   | 1.273 ± 0.222 | 1.117 ± 0.079 | 1.587 ± 0.561        | 1.331 ± 0.231        |
| TNF-α     | 0.0063  | 14.34   | 5.522 ± 2.169 | <i>13.647 ± 3.878</i> | <i>12.433 ± 3.537</i> | <b>12.388 ± 2.363</b> | 0.0088  | 13.57   | 1.942 ± 0.181 | 2.263 ± 0.371 | 2.154 ± 0.314        | <b>3.106 ± 0.399</b> |
| 3 Days    |         |         |               |                       |                       |                       |         |         |               |               |                      |                      |
| Gene      | 3 Days  |         |               |                       |                       |                       | 7 Days  |         |               |               |                      |                      |
|           | p-value | KW Stat | 5 Gy          | 15 Gy                 | 25 Gy                 | 35 Gy                 | p-value | KW Stat | 5 Gy          | 15 Gy         | 25 Gy                | 35 Gy                |
| Caspase-1 | 0.1328  | 7.06    | 0.687 ± 0.091 | 0.971 ± 0.181         | 0.909 ± 0.032         | 0.964 ± 0.043         | 0.6467  | 2.489   | 0.831 ± 0.182 | 0.974 ± 0.542 | 0.519 ± 0.048        | 0.720 ± 0.243        |
| CCL2      | 0.6126  | 2.681   | 0.804 ± 0.104 | 1.304 ± 0.193         | 1.129 ± 0.244         | 0.845 ± 0.089         | 0.6074  | 2.71    | 0.540 ± 0.136 | 1.260 ± 0.757 | 0.674 ± 0.095        | 1.209 ± 0.580        |
| CCR2      | 0.1691  | 6.432   | 0.559 ± 0.131 | 0.799 ± 0.166         | 0.509 ± 0.127         | 0.626 ± 0.071         | 0.4801  | 3.486   | 0.741 ± 0.209 | 0.943 ± 0.567 | 0.346 ± 0.056        | 0.834 ± 0.507        |
| CD11b     | 0.1203  | 7.311   | 0.727 ± 0.032 | 0.856 ± 0.084         | 0.673 ± 0.027         | 0.770 ± 0.104         | 0.0346  | 10.38   | 0.936 ± 0.151 | 0.784 ± 0.196 | 0.579 ± 0.038        | <i>0.625 ± 0.115</i> |
| COX-1     | 0.425   | 3.862   | 0.743 ± 0.040 | 0.975 ± 0.118         | 0.767 ± 0.024         | 0.880 ± 0.150         | 0.2     | 5.989   | 0.853 ± 0.137 | 0.746 ± 0.210 | 0.608 ± 0.033        | 0.650 ± 0.143        |
| COX-2     | 0.1312  | 7.089   | 0.757 ± 0.049 | 1.143 ± 0.154         | 0.827 ± 0.066         | 0.916 ± 0.098         | 0.1046  | 7.665   | 1.050 ± 0.179 | 0.852 ± 0.256 | 0.590 ± 0.024        | 0.684 ± 0.149        |
| GFAP      | 0.0758  | 8.47    | 0.801 ± 0.051 | 1.201 ± 0.233         | 1.041 ± 0.042         | 1.280 ± 0.129         | 0.7897  | 1.706   | 0.813 ± 0.223 | 1.105 ± 0.625 | 0.595 ± 0.055        | 0.835 ± 0.311        |
| GSTP-1    | 0.2022  | 5.959   | 0.685 ± 0.048 | 0.940 ± 0.145         | 0.837 ± 0.033         | 0.816 ± 0.064         | 0.3544  | 4.401   | 0.811 ± 0.251 | 0.891 ± 0.557 | 0.420 ± 0.045        | 0.778 ± 0.393        |
| HO-1      | 0.0401  | 10.02   | 0.717 ± 0.033 | 1.028 ± 0.120         | 0.856 ± 0.038         | 1.056 ± 0.199         | 0.6989  | 2.201   | 0.809 ± 0.173 | 0.993 ± 0.461 | 0.591 ± 0.047        | 0.932 ± 0.358        |
| ICAM-1    | 0.1084  | 7.577   | 1.320 ± 0.218 | 1.379 ± 0.171         | 1.491 ± 0.069         | 1.792 ± 0.296         | 0.2769  | 5.103   | 0.590 ± 0.072 | 0.799 ± 0.299 | 0.631 ± 0.022        | 0.863 ± 0.200        |
| IL-1α     | 0.1382  | 6.956   | 0.714 ± 0.057 | 0.983 ± 0.149         | 0.673 ± 0.041         | 0.718 ± 0.071         | 0.2814  | 5.058   | 0.975 ± 0.208 | 1.133 ± 0.615 | 0.575 ± 0.028        | 0.677 ± 0.284        |
| IL-1β     | 0.5249  | 3.2     | 0.552 ± 0.057 | 1.232 ± 0.446         | 0.693 ± 0.119         | 1.048 ± 0.295         | 0.9641  | 0.5908  | 0.837 ± 0.222 | 0.944 ± 0.412 | 0.704 ± 0.115        | 0.871 ± 0.366        |
| IL-1R1    | 0.1294  | 7.126   | 0.873 ± 0.064 | 1.163 ± 0.111         | 0.783 ± 0.049         | 0.921 ± 0.078         | 0.0674  | 8.758   | 0.655 ± 0.102 | 0.776 ± 0.241 | 0.477 ± 0.025        | 0.671 ± 0.181        |
| IL-1R2    | 0.3411  | 45.12   | 0.593 ± 0.047 | 1.189 ± 0.442         | 0.855 ± 0.095         | 0.905 ± 0.145         | 0.2522  | 5.361   | 0.847 ± 0.207 | 1.326 ± 0.924 | 0.504 ± 0.054        | 0.738 ± 0.186        |
| IL-6      | 0.2815  | 5.057   | 0.526 ± 0.115 | 0.793 ± 0.087         | 0.670 ± 0.054         | 1.102 ± 0.347         | 0.6348  | 2.555   | 0.896 ± 0.189 | 1.111 ± 0.648 | 0.583 ± 0.043        | 0.567 ± 0.077        |
| MHC II AA | 0.0026  | 16.31   | 0.389 ± 0.035 | 0.411 ± 0.104         | <i>0.302 ± 0.031</i>  | <b>0.215 ± 0.023</b>  | 0.0961  | 7.879   | 0.468 ± 0.153 | 0.585 ± 0.378 | 0.253 ± 0.047        | 0.298 ± 0.121        |
| Ptges     | 0.6139  | 2.673   | 0.731 ± 0.044 | 0.983 ± 0.112         | 0.784 ± 0.011         | 0.962 ± 0.166         | 0.4846  | 3.456   | 0.828 ± 0.185 | 0.985 ± 0.501 | 0.559 ± 0.035        | 0.866 ± 0.324        |
| Ptges2    | 0.4117  | 3.958   | 0.675 ± 0.039 | 1.020 ± 0.164         | 0.769 ± 0.026         | 0.846 ± 0.112         | 0.2515  | 5.369   | 0.817 ± 0.202 | 0.864 ± 0.461 | 0.464 ± 0.038        | 0.690 ± 0.274        |
| Ptges3    | 0.13703 | 6.978   | 0.609 ± 0.051 | 1.121 ± 0.206         | 0.735 ± 0.025         | 0.969 ± 0.206         | 0.2079  | 5.886   | 0.786 ± 0.300 | 0.954 ± 0.628 | 0.361 ± 0.052        | 0.783 ± 0.484        |
| SOD2      | 0.2383  | 5.516   | 0.778 ± 0.049 | 1.053 ± 0.114         | 0.845 ± 0.026         | 0.917 ± 0.076         | 0.4801  | 3.486   | 0.856 ± 0.237 | 0.885 ± 0.481 | 0.457 ± 0.038        | 0.757 ± 0.328        |
| TGF-β1    | 0.7545  | 1.898   | 0.676 ± 0.051 | 0.848 ± 0.133         | 0.776 ± 0.036         | 0.850 ± 0.110         | 0.324   | 4.66    | 0.832 ± 0.273 | 0.942 ± 0.609 | 0.389 ± 0.043        | 0.753 ± 0.399        |
| TNF-α     | 0.61    | 2.695   | 0.784 ± 0.671 | 1.595 ± 0.483         | 0.957 ± 0.086         | 1.235 ± 0.304         | 0.7396  | 1.979   | 0.671 ± 0.212 | 0.754 ± 0.348 | 0.617 ± 0.027        | 0.720 ± 0.278        |

| Gene      | 1 Month |         |               |               |               |               | 3 Months |         |               |                |               |               |
|-----------|---------|---------|---------------|---------------|---------------|---------------|----------|---------|---------------|----------------|---------------|---------------|
|           | p-value | KW Stat | 5 Gy          | 15 Gy         | 25 Gy         | 35 Gy         | p-value  | KW Stat | 5 Gy          | 15 Gy          | 25 Gy         | 35 Gy         |
| Caspase-1 | 0.2208  | 5.723   | 1.199 ± 0.204 | 1.394 ± 0.160 | 1.298 ± 0.178 | 1.585 ± 0.148 | 0.7708   | 1.809   | 1.398 ± 0.536 | 1.289 ± 0.347  | 1.595 ± 0.396 | 1.786 ± 0.460 |
| CCL2      | 0.0544  | 9.284   | 0.995 ± 0.060 | 0.791 ± 0.153 | 1.781 ± 0.360 | 1.568 ± 0.125 | 0.5959   | 2.777   | 1.187 ± 0.610 | 1.187 ± 0.449  | 1.941 ± 0.599 | 1.824 ± 0.763 |
| CCR2      | 0.6626  | 2.4     | 1.004 ± 0.045 | 0.976 ± 0.068 | 1.116 ± 0.067 | 1.033 ± 0.062 | 0.8189   | 1.543   | 1.012 ± 0.312 | 0.755 ± 0.190  | 0.953 ± 0.354 | 1.263 ± 0.411 |
| CD11b     | 0.0221  | 11.44   | 1.019 ± 0.052 | 0.833 ± 0.045 | 0.817 ± 0.047 | 0.804 ± 0.045 | 0.9155   | 0.9619  | 0.971 ± 0.143 | 0.872 ± 0.119  | 0.955 ± 0.169 | 0.933 ± 0.153 |
| COX-1     | 0.3794  | 4.202   | 1.063 ± 0.059 | 0.958 ± 0.026 | 1.056 ± 0.053 | 0.975 ± 0.067 | 0.7882   | 1.714   | 0.953 ± 0.200 | 1.012 ± 0.171  | 1.076 ± 0.189 | 1.080 ± 0.170 |
| COX-2     | 0.0012  | 18.03   | 0.894 ± 0.057 | 0.634 ± 0.031 | 0.587 ± 0.046 | 0.504 ± 0.069 | 0.904    | 1.038   | 0.856 ± 0.164 | 0.942 ± 0.126  | 1.011 ± 0.173 | 0.916 ± 0.158 |
| GFAP      | 0.0023  | 16.63   | 0.957 ± 0.021 | 1.106 ± 0.054 | 1.405 ± 0.072 | 1.421 ± 0.110 | 0.4291   | 3.833   | 1.389 ± 0.566 | 1.244 ± 0.306  | 1.830 ± 0.469 | 1.948 ± 0.474 |
| GSTP-1    | 0.0013  | 17.87   | 0.946 ± 0.012 | 0.793 ± 0.020 | 0.822 ± 0.016 | 0.780 ± 0.032 | 0.986    | 0.3545  | 1.143 ± 0.551 | 0.858 ± 0.229  | 1.322 ± 0.414 | 1.181 ± 0.392 |
| HO-1      | 0.1286  | 7.141   | 0.890 ± 0.030 | 0.819 ± 0.039 | 1.028 ± 0.071 | 0.951 ± 0.077 | 0.7775   | 1.772   | 0.992 ± 0.376 | 0.827 ± 0.133  | 1.128 ± 0.253 | 1.127 ± 0.278 |
| ICAM-1    | 0.0216  | 11.48   | 0.742 ± 0.033 | 0.572 ± 0.031 | 0.848 ± 0.027 | 0.839 ± 0.081 | 0.3517   | 4.423   | 0.620 ± 0.152 | 0.710 ± 0.094  | 0.773 ± 0.127 | 0.878 ± 0.124 |
| IL-1α     | 0.6348  | 2.555   | 0.845 ± 0.212 | 0.871 ± 0.237 | 0.704 ± 0.073 | 1.086 ± 0.210 | 0.9582   | 0.6425  | 1.132 ± 0.361 | 0.908 ± 0.165  | 1.186 ± 0.314 | 1.101 ± 0.217 |
| IL-1β     | 0.1265  | 7.184   | 0.983 ± 0.097 | 0.826 ± 0.189 | 1.274 ± 0.247 | 0.659 ± 0.107 | 0.8044   | 1.625   | 1.113 ± 0.410 | 1.282 ± 0.411  | 1.446 ± 0.390 | 1.578 ± 0.299 |
| IL-1R1    | 0.1994  | 5.996   | 0.893 ± 0.078 | 0.934 ± 0.088 | 0.783 ± 0.055 | 0.797 ± 0.037 | 0.703    | 2.178   | 0.865 ± 0.283 | 0.860 ± 0.147  | 1.071 ± 0.234 | 0.725 ± 0.126 |
| IL-1R2    | 0.2717  | 3.907   | 1.234 ± 0.000 | 1.353 ± 0.394 | 0.797 ± 0.212 | 0.640 ± 0.034 | 0.6732   | 2.342   | 1.356 ± 0.703 | 0.911 ± 0.250  | 1.346 ± 0.360 | 1.157 ± 0.194 |
| IL-6      | 0.4687  | 3.561   | 1.226 ± 0.118 | 1.613 ± 0.340 | 1.635 ± 0.218 | 1.429 ± 0.321 | 0.9989   | 0.096   | 0.922 ± 0.344 | 0.751 ± 0.144  | 0.861 ± 0.259 | 0.826 ± 0.226 |
| MHC II AA | 0.0094  | 13.41   | 1.011 ± 0.085 | 1.547 ± 0.395 | 2.050 ± 0.439 | 2.534 ± 0.194 | 0.1799   | 6.27    | 1.305 ± 0.485 | 1.280 ± 0.390  | 2.633 ± 0.807 | 2.490 ± 0.901 |
| Ptges     | 0.791   | 1.698   | 1.048 ± 0.038 | 1.052 ± 0.064 | 0.972 ± 0.089 | 0.996 ± 0.089 | 0.9608   | 0.6203  | 0.991 ± 0.298 | 0.868 ± 0.171  | 1.247 ± 0.307 | 1.077 ± 0.287 |
| Ptges2    | 0.222   | 5.708   | 0.970 ± 0.051 | 0.906 ± 0.021 | 0.944 ± 0.037 | 0.885 ± 0.039 | 0.8264   | 1.501   | 1.172 ± 0.459 | 1.009 ± 0.216  | 1.337 ± 0.350 | 1.237 ± 0.343 |
| Ptges3    | 0.3166  | 4.726   | 0.954 ± 0.074 | 1.057 ± 0.091 | 1.079 ± 0.060 | 1.305 ± 0.144 | 0.9299   | 0.8621  | 0.985 ± 0.530 | 0.797 ± 0.276  | 1.295 ± 0.499 | 0.866 ± 0.304 |
| SOD2      | 0.0136  | 12.56   | 0.939 ± 0.011 | 0.856 ± 0.034 | 0.856 ± 0.041 | 0.729 ± 0.051 | 0.9887   | 0.3175  | 1.076 ± 0.428 | 0.940 ± 0.224  | 1.339 ± 0.378 | 1.181 ± 0.362 |
| TGF-β1    | 0.3663  | 4.305   | 1.217 ± 0.166 | 1.367 ± 0.331 | 1.634 ± 0.147 | 1.409 ± 0.217 | 0.9616   | 0.6129  | 1.081 ± 0.553 | 0.848 ± 0.229  | 1.324 ± 0.441 | 1.066 ± 0.343 |
| TNF-α     | 0.5204  | 3.228   | 1.041 ± 0.337 | 1.131 ± 0.164 | 1.465 ± 0.226 | 1.327 ± 0.212 | 0.0718   | 8.603   | 1.014 ± 0.283 | 1.325 ± 0.262  | 2.199 ± 0.977 | 2.444 ± 0.539 |
| 6 Months  |         |         |               |               |               | 12 Months     |          |         |               |                |               |               |
| Gene      | p-value | KW Stat | 5 Gy          | 15 Gy         | 25 Gy         | 35 Gy         | p-value  | KW Stat | 5 Gy          | 15 Gy          | 25 Gy         | 35 Gy         |
| Caspase-1 | 0.0869  | 8.132   | 1.836 ± 0.492 | 1.311 ± 0.191 | 2.852 ± 0.773 | 2.198 ± 0.535 | 0.3681   | 4.29    | 1.592 ± 0.615 | 1.671 ± 0.423  | 1.107 ± 0.246 | 1.635 ± 0.272 |
| CCL2      | 0.006   | 14.44   | 3.495 ± 0.539 | 1.843 ± 0.102 | 6.026 ± 2.298 | 4.271 ± 0.781 | 0.3928   | 4.098   | 2.760 ± 1.082 | 1.559 ± 0.383  | 1.257 ± 0.314 | 1.980 ± 0.280 |
| CCR2      | 0.029   | 10.79   | 1.803 ± 0.548 | 0.649 ± 0.086 | 3.077 ± 1.112 | 2.086 ± 0.609 | 0.1451   | 6.831   | 4.072 ± 2.436 | 0.0776 ± 0.134 | 0.805 ± 0.323 | 1.189 ± 0.496 |
| CD11b     | 0.2848  | 5.024   | 1.530 ± 0.246 | 1.092 ± 0.044 | 1.308 ± 0.144 | 1.293 ± 0.191 | 0.0687   | 8.714   | 1.253 ± 0.106 | 0.945 ± 0.086  | 0.769 ± 0.126 | 1.196 ± 0.177 |
| COX-1     | 0.039   | 10.09   | 1.643 ± 0.234 | 1.244 ± 0.050 | 1.744 ± 0.230 | 1.784 ± 0.239 | 0.1886   | 6.144   | 1.280 ± 0.181 | 1.034 ± 0.137  | 0.926 ± 0.138 | 1.561 ± 0.427 |
| COX-2     | 0.1762  | 6.324   | 1.545 ± 0.175 | 1.588 ± 0.115 | 1.840 ± 0.322 | 1.430 ± 0.119 | 0.4812   | 3.478   | 1.189 ± 0.175 | 1.136 ± 0.180  | 0.812 ± 0.125 | 0.939 ± 0.207 |
| GFAP      | 0.0342  | 10.4    | 1.836 ± 0.364 | 1.373 ± 0.167 | 3.236 ± 0.797 | 2.790 ± 0.549 | 0.1588   | 6.646   | 1.707 ± 0.667 | 1.869 ± 0.429  | 1.238 ± 0.271 | 2.030 ± 0.248 |
| GSTP-1    | 0.0493  | 9.524   | 2.310 ± 0.710 | 1.117 ± 0.141 | 3.131 ± 1.031 | 2.432 ± 0.702 | 0.387    | 4.143   | 1.798 ± 0.760 | 1.560 ± 0.362  | 0.980 ± 0.351 | 1.368 ± 0.121 |
| HO-1      | 0.0292  | 10.77   | 1.902 ± 0.320 | 1.406 ± 0.068 | 2.511 ± 0.560 | 2.640 ± 0.543 | 0.2828   | 5.044   | 1.525 ± 0.383 | 1.277 ± 0.213  | 0.845 ± 0.176 | 1.514 ± 0.155 |
| ICAM-1    | 0.0493  | 9.52    | 4.497 ± 1.128 | 2.783 ± 0.525 | 2.469 ± 0.440 | 2.151 ± 0.332 | 0.0184   | 11.87   | 2.633 ± 0.538 | 1.446 ± 0.245  | 1.104 ± 0.171 | 1.846 ± 0.282 |
| IL-1α     | 0.2552  | 5.329   | 1.458 ± 0.406 | 1.203 ± 0.189 | 2.001 ± 0.671 | 1.910 ± 0.318 | 0.6296   | 2.585   | 1.371 ± 0.360 | 1.455 ± 0.255  | 0.967 ± 0.219 | 1.171 ± 0.174 |
| IL-1β     | 0.0789  | 8.372   | 2.450 ± 0.621 | 2.157 ± 0.390 | 5.114 ± 1.562 | 2.930 ± 0.567 | 0.0864   | 8.145   | 2.510 ± 0.712 | 2.761 ± 0.648  | 1.583 ± 0.466 | 3.314 ± 0.775 |
| IL-1R1    | 0.0544  | 9.281   | 1.674 ± 0.261 | 1.187 ± 0.022 | 1.675 ± 0.229 | 1.750 ± 0.340 | 0.0933   | 7.953   | 1.405 ± 0.319 | 1.237 ± 0.196  | 0.769 ± 0.113 | 1.392 ± 0.140 |
| IL-1R2    | 0.073   | 8.564   | 2.110 ± 0.751 | 1.051 ± 0.086 | 2.980 ± 0.915 | 2.375 ± 0.709 | 0.0551   | 9.253   | 2.532 ± 0.497 | 2.255 ± 0.721  | 1.586 ± 0.322 | 2.286 ± 0.453 |
| IL-6      | 0.0761  | 8.46    | 2.916 ± 0.604 | 1.638 ± 0.267 | 3.246 ± 1.027 | 3.176 ± 0.859 | 0.5277   | 3.183   | 1.171 ± 0.291 | 1.262 ± 0.350  | 0.704 ± 0.273 | 1.229 ± 0.392 |
| MHC II AA | 0.0356  | 10.3    | 2.430 ± 0.775 | 1.696 ± 0.369 | 4.691 ± 1.527 | 3.969 ± 1.030 | 0.1589   | 6.594   | 1.701 ± 0.623 | 1.868 ± 0.433  | 1.290 ± 0.386 | 2.436 ± 0.515 |
| Ptges     | 0.0273  | 10.94   | 2.020 ± 0.403 | 1.421 ± 0.057 | 2.271 ± 0.492 | 2.254 ± 0.390 | 0.2611   | 5.265   | 1.746 ± 0.519 | 1.402 ± 0.262  | 0.945 ± 0.244 | 1.515 ± 0.131 |
| Ptges2    | 0.0279  | 10.88   | 2.095 ± 0.399 | 1.479 ± 0.064 | 2.921 ± 0.799 | 2.237 ± 0.526 | 0.4047   | 4.01    | 1.627 ± 0.587 | 1.613 ± 0.364  | 1.003 ± 0.294 | 1.325 ± 0.168 |
| Ptges3    | 0.0157  | 12.23   | 3.298 ± 1.295 | 1.250 ± 0.083 | 3.641 ± 1.194 | 3.226 ± 0.951 | 0.4525   | 3.67    | 1.627 ± 0.599 | 1.088 ± 0.232  | 0.652 ± 0.249 | 1.286 ± 0.116 |
| SOD2      | 0.0688  | 8.78    | 1.912 ± 0.497 | 1.102 ± 0.070 | 2.612 ± 0.791 | 2.171 ± 0.509 | 0.4439   | 3.729   | 1.510 ± 0.499 | 1.479 ± 0.287  | 0.894 ± 0.261 | 1.390 ± 0.096 |
| TGF-β1    | 0.0288  | 10.81   | 2.324 ± 0.656 | 1.226 ± 0.163 | 3.162 ± 0.971 | 2.393 ± 0.592 | 0.4333   | 3.803   | 1.718 ± 0.697 | 1.527 ± 0.326  | 0.886 ± 0.303 | 1.429 ± 0.176 |
| TNF-α     | 0.0048  | 14.96   | 4.472 ± 1.299 | 3.790 ± 0.429 | 6.061 ± 1.070 | 8.125 ± 1.222 | 0.0596   | 9.061   | 1.973 ± 0.665 | 2.355 ± 0.570  | 1.443 ± 0.134 | 2.897 ± 0.468 |
